# Supplementary material for: Xylooligosaccharides from corn cobs alleviate loperamide-induced constipation in mice via modulation of gut microbiota and SCFA metabolism
Source: Royal Society of Chemistry journal article supplement (doi:10.1039/d3fo02688d), 2023-01-01
Supplement: d3fo02688d1.pdf [file d3fo02688d1.pdf]

1 Supplementary Materials

2

3 **Xylooligosaccharides from corn cobs alleviates loperamide-induced**  
4 **constipation in mice via modulation of gut microbiota and SCFAs**  
5 **metabolism**

6

7 Hong Song <sup>a</sup>, Rui Guo <sup>a</sup>, Xianbao Sun <sup>a</sup>, Yuxing Kou <sup>a</sup>, Xuan Ma <sup>a</sup>, Yinan Chen <sup>a</sup>, Lihua Song <sup>a</sup>,  
8 Chunmei Yuan <sup>b</sup>, Yan Wu <sup>a\*</sup>

9

10 <sup>a</sup> *Department of Food Science and Engineering, School of Agriculture and Biology, Shanghai Jiao*  
11 *Tong University, Shanghai 200240, China;*

12 <sup>b</sup> *Yunnan Maoduoli Group Food Co., Ltd., Yuxi 653100, China*

13

14 \*Corresponding author: Yan Wu

15 Tel.: +86-21-34205715

16 E-mail addresses: [sh1113631370@163.com](mailto:sh1113631370@163.com) (Hong Song), [jackal123@163.com](mailto:jackal123@163.com) (Rui Guo),  
17 [sunxianbao@hotmail.com](mailto:sunxianbao@hotmail.com) (Xianbao Sun), [kouyuxing123@163.com](mailto:kouyuxing123@163.com) (Yuxing Kou),  
18 [maxuan0122@163.com](mailto:maxuan0122@163.com) (Xuan Ma), [gingko-c@sjtu.edu.cn](mailto:gingko-c@sjtu.edu.cn) (Yinan Chen), [lihuas@sjtu.edu.cn](mailto:lihuas@sjtu.edu.cn)  
19 (Lihua Song), [1397141915@qq.com](mailto:1397141915@qq.com) (Chunmei Yuan), [wuy@sjtu.edu.cn](mailto:wuy@sjtu.edu.cn) (Yan Wu)

20

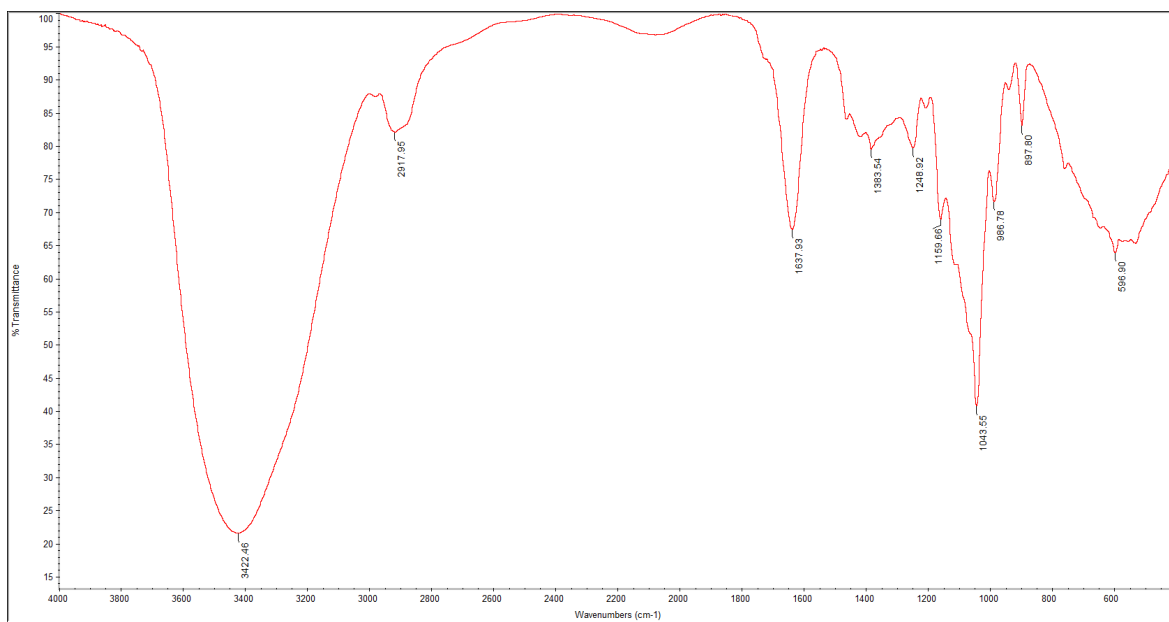

21

22 **Fig. S1.** The FT-IR spectrum of XOS.

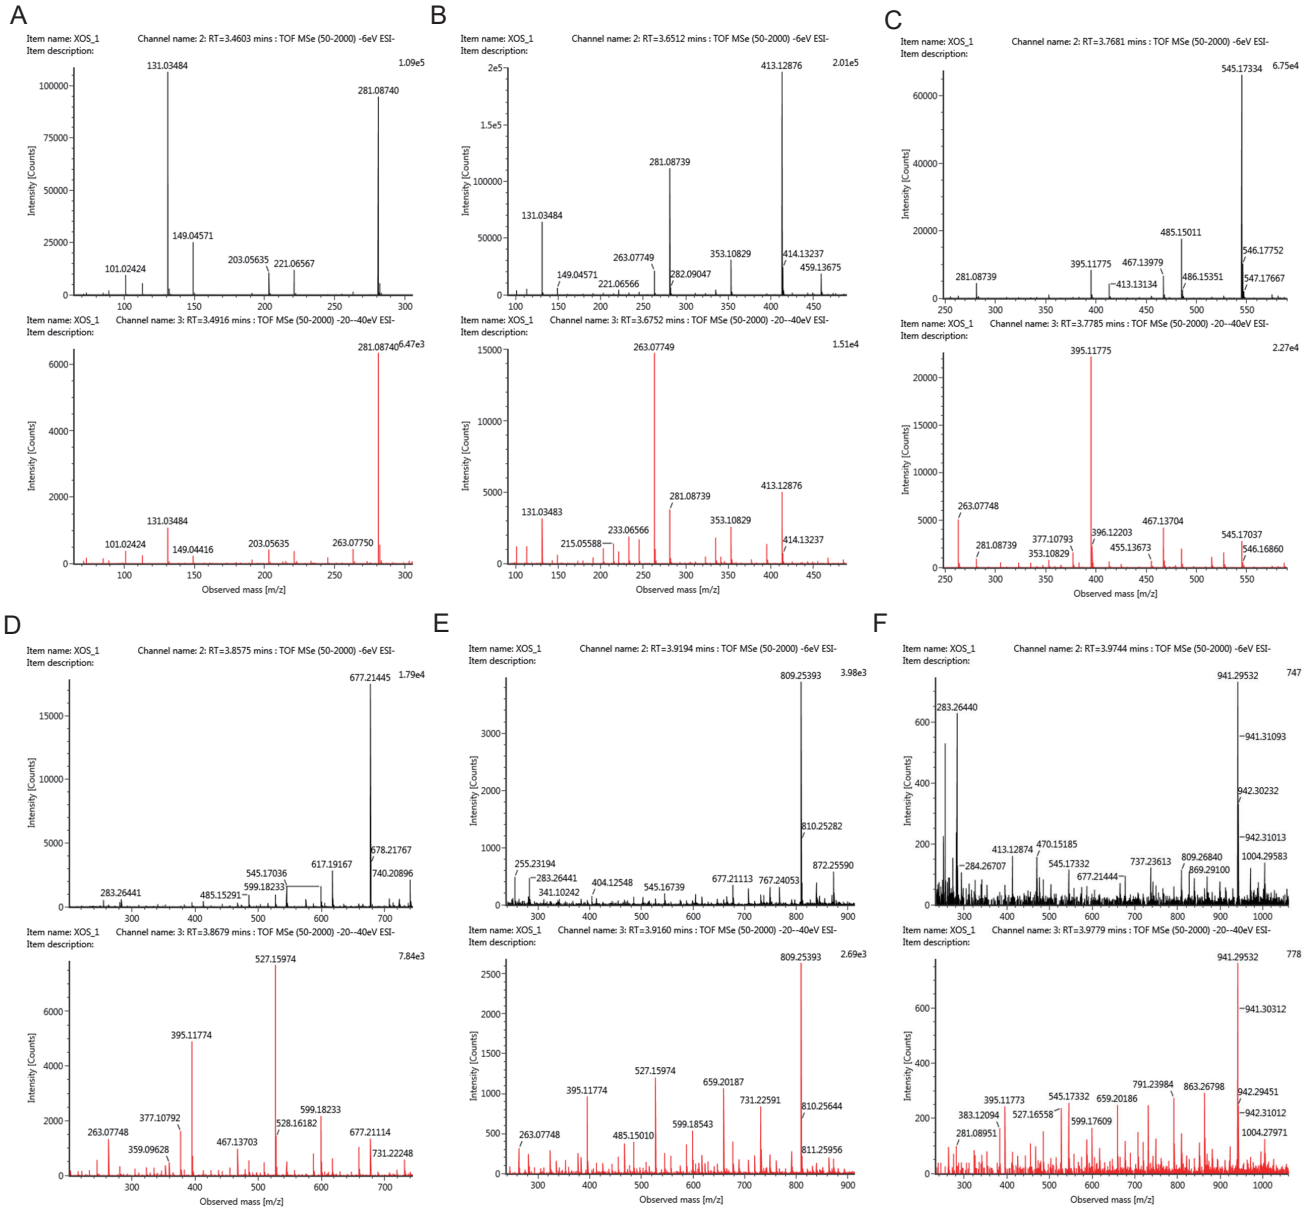

23

24 **Fig. S2.** The negative mass spectrum of XOS DP 2-7 (A-F).

25

26 **Table S1.** The fragment ions of XOS produced by UHPLC-HDMS<sup>E</sup>

| RT                                     | DP                                                                      | [M-H] <sup>-</sup> | Glycosidic bond cleavages ions         | Cross-ring cleavage ions                                                |
|----------------------------------------|-------------------------------------------------------------------------|--------------------|----------------------------------------|-------------------------------------------------------------------------|
| 15.287                                 | 2                                                                       | 281.08740          | C <sub>1</sub> ( <i>m/z</i> 149.04571) | <sup>0,2</sup> A <sub>2</sub> ( <i>m/z</i> 221.06567)                   |
|                                        |                                                                         |                    | Y <sub>1</sub> ( <i>m/z</i> 149.04571) |                                                                         |
| 13.193                                 | 3                                                                       | 413.12876          | C <sub>2</sub> ( <i>m/z</i> 281.08739) | <sup>0,2</sup> A <sub>3</sub> ( <i>m/z</i> 353.10829)                   |
|                                        |                                                                         |                    | C <sub>1</sub> ( <i>m/z</i> 149.04571) | <sup>0,2</sup> A <sub>2</sub> ( <i>m/z</i> 221.06566)                   |
|                                        |                                                                         |                    | Y <sub>2</sub> ( <i>m/z</i> 281.08739) | <sup>0,2</sup> A <sub>3</sub> -H <sub>2</sub> O ( <i>m/z</i> 335.10453) |
|                                        |                                                                         |                    | Y <sub>1</sub> ( <i>m/z</i> 149.04571) | <sup>0,2</sup> A <sub>2</sub> -H <sub>2</sub> O ( <i>m/z</i> 207.06325) |
| 11.792                                 | 4                                                                       | 545.17334          | C <sub>3</sub> ( <i>m/z</i> 413.13134) | <sup>0,2</sup> A <sub>4</sub> ( <i>m/z</i> 485.15011)                   |
|                                        |                                                                         |                    | C <sub>2</sub> ( <i>m/z</i> 281.08739) | <sup>0,2</sup> A <sub>3</sub> ( <i>m/z</i> 353.10829)                   |
|                                        |                                                                         |                    | Y <sub>3</sub> ( <i>m/z</i> 413.13134) | <sup>0,2</sup> A <sub>4</sub> -H <sub>2</sub> O ( <i>m/z</i> 467.13979) |
|                                        |                                                                         |                    | Y <sub>2</sub> ( <i>m/z</i> 281.08739) | <sup>0,2</sup> A <sub>3</sub> -H <sub>2</sub> O ( <i>m/z</i> 335.10453) |
| 10.830                                 | 5                                                                       | 677.21445          | C <sub>4</sub> ( <i>m/z</i> 545.17036) | <sup>0,2</sup> A <sub>5</sub> ( <i>m/z</i> 617.19167)                   |
|                                        |                                                                         |                    | C <sub>3</sub> ( <i>m/z</i> 413.12876) | <sup>0,2</sup> A <sub>4</sub> ( <i>m/z</i> 485.15291)                   |
|                                        |                                                                         |                    | C <sub>2</sub> ( <i>m/z</i> 281.08740) | <sup>0,2</sup> A <sub>3</sub> ( <i>m/z</i> 353.10829)                   |
|                                        |                                                                         |                    | Y <sub>4</sub> ( <i>m/z</i> 545.17036) | <sup>0,2</sup> A <sub>5</sub> -H <sub>2</sub> O ( <i>m/z</i> 599.18223) |
|                                        |                                                                         |                    | Y <sub>3</sub> ( <i>m/z</i> 413.12876) | <sup>0,2</sup> A <sub>4</sub> -H <sub>2</sub> O ( <i>m/z</i> 467.13979) |
| 10.267                                 | 6                                                                       | 809.25394          | Y <sub>2</sub> ( <i>m/z</i> 281.08740) | <sup>0,2</sup> A <sub>3</sub> -H <sub>2</sub> O ( <i>m/z</i> 335.10453) |
|                                        |                                                                         |                    | C <sub>5</sub> ( <i>m/z</i> 677.21113) |                                                                         |
|                                        |                                                                         |                    | C <sub>4</sub> ( <i>m/z</i> 545.16739) | <sup>0,2</sup> A <sub>6</sub> ( <i>m/z</i> 749.24672)                   |
|                                        |                                                                         |                    | C <sub>3</sub> ( <i>m/z</i> 413.12876) | <sup>0,2</sup> A <sub>5</sub> ( <i>m/z</i> 617.19445)                   |
|                                        |                                                                         |                    | C <sub>2</sub> ( <i>m/z</i> 281.08740) | <sup>0,2</sup> A <sub>4</sub> ( <i>m/z</i> 485.15011)                   |
|                                        |                                                                         |                    | Y <sub>5</sub> ( <i>m/z</i> 677.21113) | <sup>0,2</sup> A <sub>3</sub> ( <i>m/z</i> 353.10829)                   |
|                                        |                                                                         |                    | Y <sub>4</sub> ( <i>m/z</i> 545.16739) | <sup>0,2</sup> A <sub>5</sub> -H <sub>2</sub> O ( <i>m/z</i> 599.18543) |
| Y <sub>3</sub> ( <i>m/z</i> 413.12876) | <sup>0,2</sup> A <sub>4</sub> -H <sub>2</sub> O ( <i>m/z</i> 467.14413) |                    |                                        |                                                                         |
| 8.837                                  | 7                                                                       | 941.29532          | Y <sub>2</sub> ( <i>m/z</i> 281.08740) |                                                                         |
|                                        |                                                                         |                    | C <sub>6</sub> ( <i>m/z</i> 809.25394) |                                                                         |
|                                        |                                                                         |                    | C <sub>5</sub> ( <i>m/z</i> 677.21444) | <sup>0,2</sup> A <sub>7</sub> ( <i>m/z</i> 881.28752)                   |
|                                        |                                                                         |                    | C <sub>4</sub> ( <i>m/z</i> 545.17332) | <sup>0,2</sup> A <sub>6</sub> ( <i>m/z</i> 749.22679)                   |
|                                        |                                                                         |                    | C <sub>3</sub> ( <i>m/z</i> 413.12874) | <sup>0,2</sup> A <sub>5</sub> ( <i>m/z</i> 617.20143)                   |
|                                        |                                                                         |                    | C <sub>2</sub> ( <i>m/z</i> 281.08951) | <sup>0,2</sup> A <sub>4</sub> ( <i>m/z</i> 485.15011)                   |
|                                        |                                                                         |                    | Y <sub>6</sub> ( <i>m/z</i> 809.25394) | <sup>0,2</sup> A <sub>7</sub> -H <sub>2</sub> O ( <i>m/z</i> 863.26798) |
|                                        |                                                                         |                    | Y <sub>5</sub> ( <i>m/z</i> 677.21444) | <sup>0,2</sup> A <sub>6</sub> -H <sub>2</sub> O ( <i>m/z</i> 731.22351) |
|                                        |                                                                         |                    | Y <sub>4</sub> ( <i>m/z</i> 545.17332) | <sup>0,2</sup> A <sub>5</sub> -H <sub>2</sub> O ( <i>m/z</i> 599.18543) |
| Y <sub>3</sub> ( <i>m/z</i> 413.12874) |                                                                         |                    |                                        |                                                                         |
| Y <sub>2</sub> ( <i>m/z</i> 281.08951) |                                                                         |                    |                                        |                                                                         |

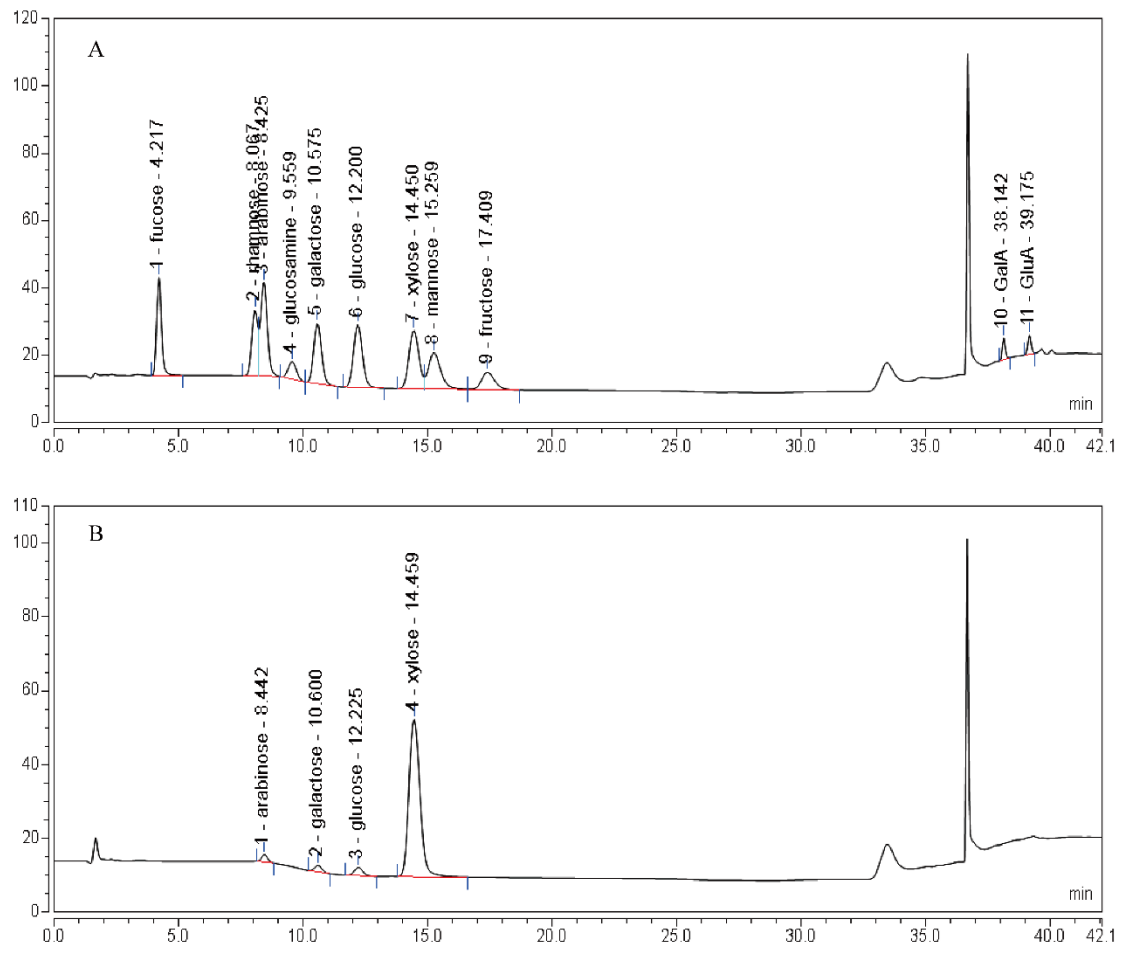

28

29 **Fig. S3.** The standard monosaccharide (A) and the monosaccharide composition analysis of

30 XOS (B).

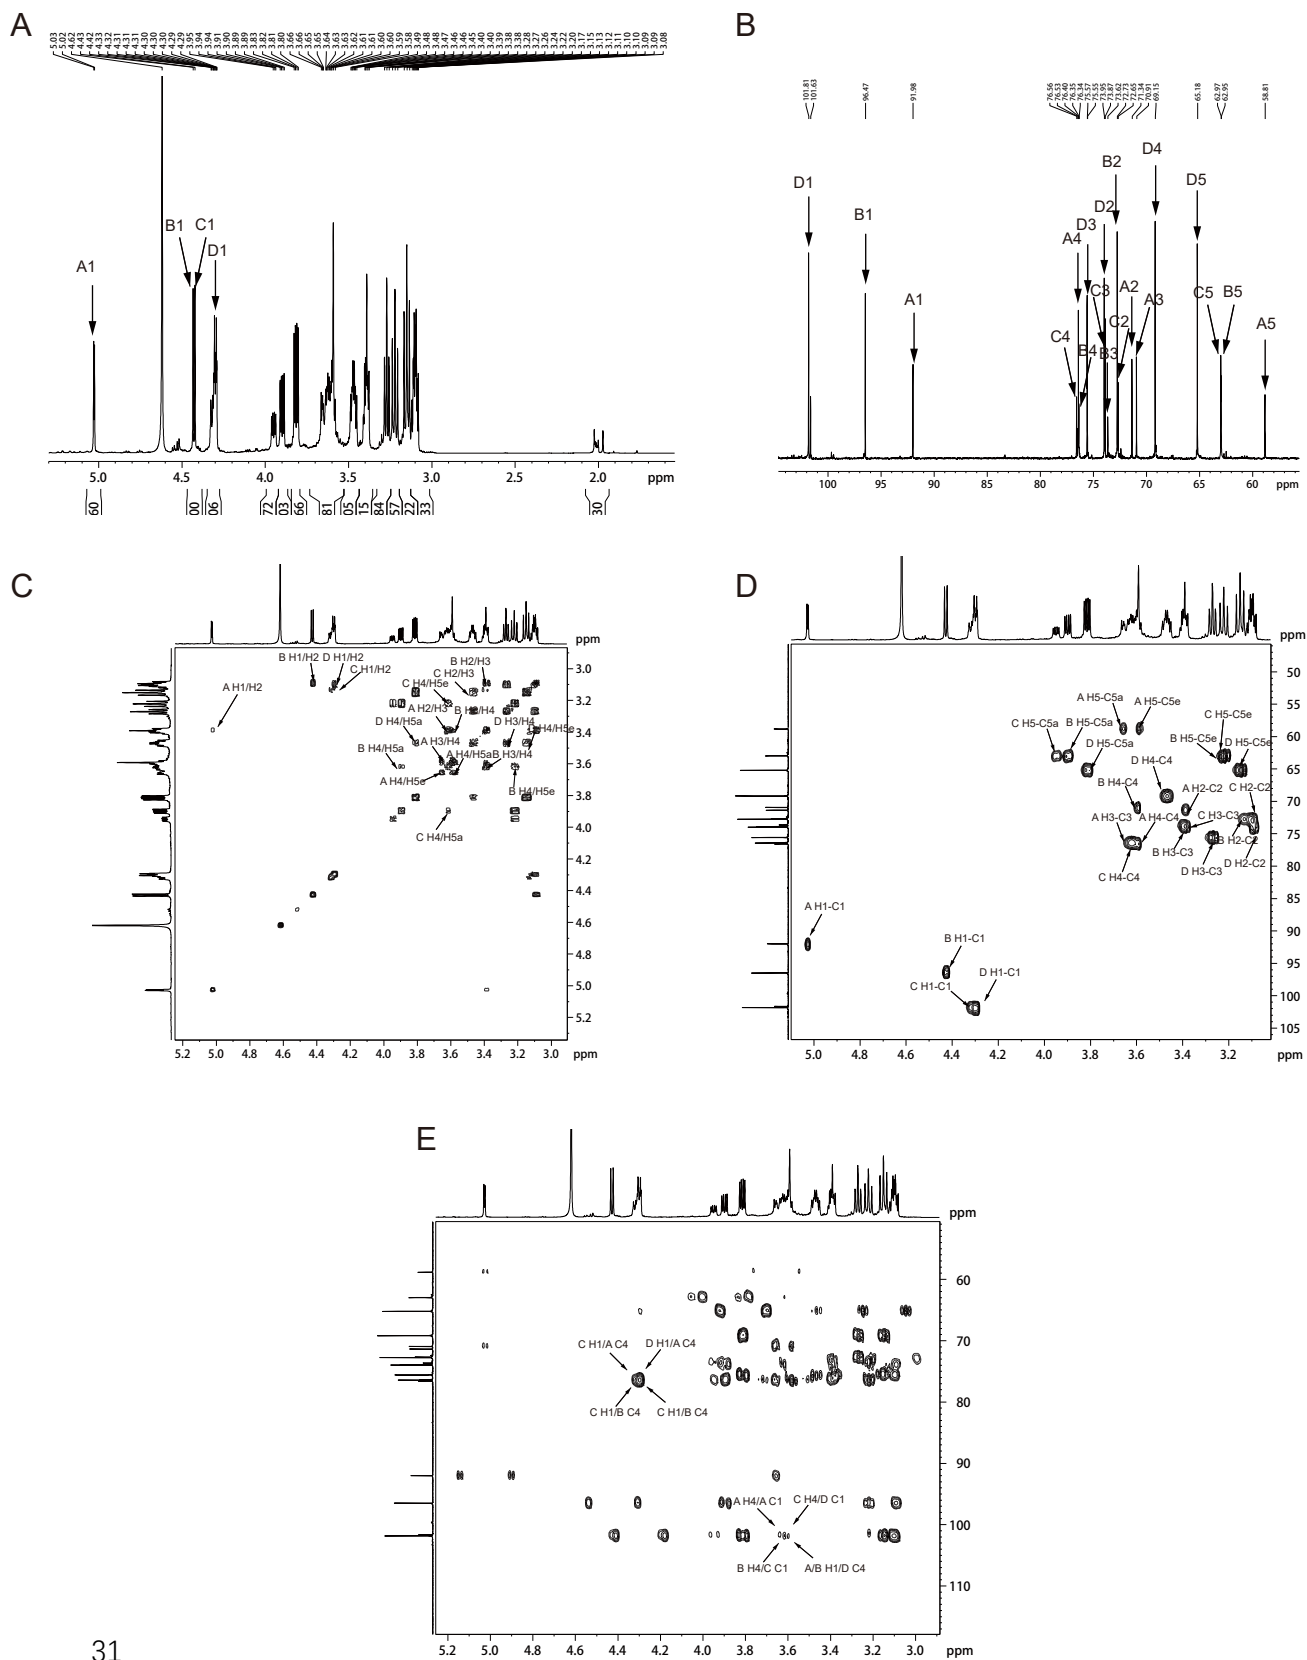

31

32 **Fig. S4.**  $^1\text{H}$  NMR (A),  $^{13}\text{C}$  NMR (B),  $^1\text{H}$ - $^1\text{H}$  correlation spectroscopy COSY (C),  $^1\text{H}$ - $^{13}\text{C}$

33 heteronuclear single quantum coherence spectroscopy HSQC (D) and  $^1\text{H}$ - $^{13}\text{C}$  heteronuclear

34 multiple bond correlation spectroscopy (HMBC) (E) spectra of XOS.

35

36 **Table S2.** The  $^1\text{H}$  NMR and  $^{13}\text{C}$  NMR signal assignments of XOS.

| Sequence residues |                                                      | H1     | H2    | H3    | H4    | H5e, H5a |      |
|-------------------|------------------------------------------------------|--------|-------|-------|-------|----------|------|
|                   |                                                      | C1     | C2    | C3    | C4    | C5       |      |
| A                 | $\rightarrow 4$ )- $\alpha$ -Xyl                     | 5.03   | 3.38  | 3.61  | 3.63  | 3.59     | 3.65 |
|                   |                                                      | 91.98  | 71.34 | 70.91 | 76.35 | 58.81    |      |
| B                 | $\rightarrow 4$ )- $\beta$ -Xyl                      | 4.43   | 3.09  | 3.40  | 3.60  | 3.24     | 3.89 |
|                   |                                                      | 96.47  | 72.73 | 73.62 | 76.34 | 62.97    |      |
| C                 | $\rightarrow 4$ )- $\beta$ -Xyl-<br>(1 $\rightarrow$ | 4.32   | 3.13  | 3.39  | 3.62  | 3.22     | 3.90 |
|                   |                                                      | 101.63 | 72.65 | 73.95 | 76.56 | 62.95    |      |
| D                 | $\beta$ -Xyl-(1 $\rightarrow$                        | 4.30   | 3.10  | 3.27  | 3.48  | 3.14     | 3.82 |
|                   |                                                      | 101.81 | 73.87 | 75.57 | 69.15 | 65.18    |      |

37

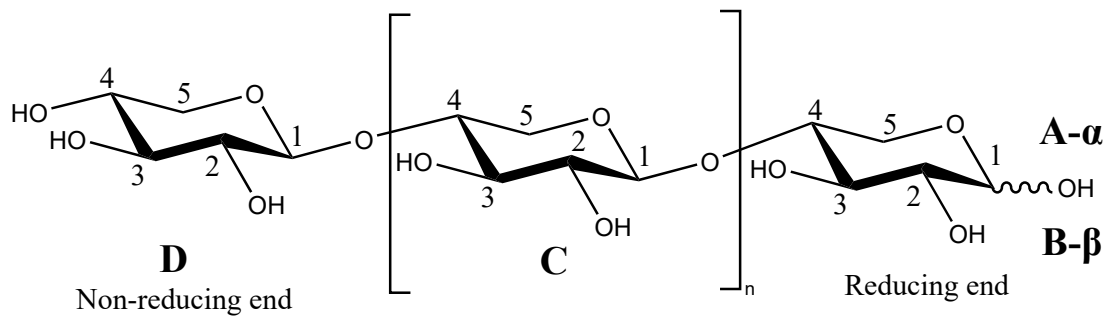

38

39 **Fig. S5.** The structure of XOS from corn cobs.
